# Supplementary material for: Demographic Analysis of Shortfin Mako Shark (Isurus oxyrinchus) in the South Pacific Ocean
Source: MDPI journal article supplement (doi:10.3390/ani12223229), 2022-11-21
Supplement: s1 [file s1]

**Table S1.**  $M_s$  (year<sup>-1</sup>) estimated using 14 indirect approaches.

| ID  | Method                | Relies on parameters | Male $M_s$ (yr <sup>-1</sup> ) | Female $M_s$ (yr <sup>-1</sup> ) |
|-----|-----------------------|----------------------|--------------------------------|----------------------------------|
| M1  | Campana et al. [64]   | $a_{max}$            | 0.148                          | 0.102                            |
| M2  | Hoeing [65]           | $a_{max}$            | 0.176                          | 0.114                            |
| M3  | Then et al. [66]      | $a_{max}$            | 0.246                          | 0.166                            |
| M4  | Then et al. [66]      | $a_{max}$            | 0.206                          | 0.133                            |
| M5  | Hamel [67]            | $a_{max}$            | 0.167                          | 0.109                            |
| M6  | Zhang and Megrey [68] | $a_{max}$ and $k$    | 0.190                          | 0.104                            |
| M7  | Jensen [69]           | $a_{mat}$            | 0.197                          | 0.083                            |
| M8  | Hisano et al. [34]    | $a_{mat}$ and $to$   | 0.180                          | 0.094                            |
| M9  | Frisk et al. [70]     | $a_{mat}$            | 0.134                          | 0.069                            |
| M10 | Cubillos et al. [71]  | $to$ and $k$         | 0.135                          | 0.116                            |
| M11 | Jensen [69]           | $k$                  | 0.139                          | 0.122                            |
| M12 | Frisk et al. [70]     | $k$                  | 0.156                          | 0.148                            |
| M13 | Hamel [67]            | $k$                  | 0.152                          | 0.134                            |
| M14 | Then et al. [66]      | $k$ and $L_\infty$   | 0.106                          | 0.093                            |
|     |                       | Median               | 0.167                          | 0.113                            |

**Table S2.** Estimated demographics in various scenarios based on a 2-year reproductive cycle.

| 2-year reproductive cycle                  |          |                                 |          |          |                           |          |          |
|--------------------------------------------|----------|---------------------------------|----------|----------|---------------------------|----------|----------|
| Case                                       | Sex      | $\lambda$ (year <sup>-1</sup> ) | Lower CL | Upper CL | $r$ (year <sup>-1</sup> ) | Lower CL | Upper CL |
| Scenario A<br>(F = 0)                      | Combined | 1.098                           | 1.036    | 1.165    | 0.093                     | 0.036    | 0.153    |
|                                            | Male     | 1.143                           | 1.050    | 1.243    | 0.133                     | 0.049    | 0.217    |
|                                            | Female   | 1.045                           | 0.978    | 1.103    | 0.044                     | -0.022   | 0.098    |
| Scenario B<br>(F = 0.8)                    | Combined | 0.949                           | 0.875    | 1.025    | -0.053                    | -0.133   | 0.024    |
|                                            | Male     | 0.977                           | 0.859    | 1.089    | -0.025                    | -0.152   | 0.086    |
|                                            | Female   | 0.911                           | 0.822    | 0.988    | -0.094                    | -0.196   | -0.012   |
| Scenario C<br>(F = 0.6)                    | Combined | 0.983                           | 0.910    | 1.058    | -0.017                    | -0.094   | 0.056    |
|                                            | Male     | 1.017                           | 0.904    | 1.127    | 0.015                     | -0.101   | 0.120    |
|                                            | Female   | 0.942                           | 0.858    | 1.016    | -0.061                    | -0.154   | 0.016    |
| Scenario D<br>(F = 0.4)                    | Combined | 1.020                           | 0.952    | 1.092    | 0.019                     | -0.049   | 0.088    |
|                                            | Male     | 1.058                           | 0.951    | 1.164    | 0.055                     | -0.051   | 0.152    |
|                                            | Female   | 0.975                           | 0.894    | 1.044    | -0.026                    | -0.112   | 0.043    |
| Scenario E<br>(F = 0.2)                    | Combined | 1.058                           | 0.993    | 1.129    | 0.056                     | -0.007   | 0.121    |
|                                            | Male     | 1.100                           | 1.001    | 1.204    | 0.094                     | 0.001    | 1.186    |
|                                            | Female   | 1.010                           | 0.935    | 1.072    | 0.009                     | -0.067   | 0.070    |
| Scenario P1<br>(F <sub>immature</sub> = 0) | Combined | 1.050                           | 0.986    | 1.118    | 0.048                     | -0.015   | 0.111    |
|                                            | Male     | 1.090                           | 0.993    | 1.192    | 0.085                     | -0.007   | 1.175    |
|                                            | Female   | 1.005                           | 0.932    | 1.068    | 0.004                     | -0.070   | 0.066    |
| Scenario P2<br>(F <sub>mature</sub> = 0)   | Combined | 1.000                           | 0.933    | 1.073    | -0.001                    | -0.069   | 0.071    |
|                                            | Male     | 1.032                           | 0.926    | 1.143    | 0.030                     | -0.077   | 0.133    |
|                                            | Female   | 0.960                           | 0.890    | 1.027    | -0.042                    | -0.116   | 0.026    |
| Scenario P3                                | Combined | 1.026                           | 0.951    | 1.102    | 0.025                     | -0.050   | 0.097    |

|                                                   |          |       |       |       |        |        |        |
|---------------------------------------------------|----------|-------|-------|-------|--------|--------|--------|
| (F <sub>immature male</sub> = 0)                  | Male     | 1.091 | 0.994 | 1.192 | 0.086  | -0.007 | 0.176  |
|                                                   | Female   | 0.917 | 0.827 | 0.997 | -0.088 | -0.190 | -0.003 |
| Scenario P4<br>(F <sub>mature male</sub> = 0)     | Combined | 0.989 | 0.914 | 1.068 | -0.012 | -0.090 | 0.065  |
|                                                   | Male     | 1.033 | 0.926 | 1.141 | 0.031  | -0.077 | 0.132  |
|                                                   | Female   | 0.913 | 0.825 | 0.990 | -0.092 | -0.192 | -0.011 |
| Scenario P5<br>(F <sub>immature female</sub> = 0) | Combined | 0.997 | 0.934 | 1.056 | -0.004 | -0.068 | 0.055  |
|                                                   | Male     | 0.979 | 0.862 | 1.091 | -0.023 | -0.148 | 0.087  |
|                                                   | Female   | 0.999 | 0.928 | 1.061 | -0.002 | -0.074 | 0.059  |
| Scenario P6<br>(F <sub>mature female</sub> = 0)   | Combined | 0.972 | 0.912 | 1.037 | -0.029 | -0.093 | 0.036  |
|                                                   | Male     | 0.978 | 0.863 | 1.089 | -0.024 | -0.147 | 0.085  |
|                                                   | Female   | 0.960 | 0.839 | 1.026 | -0.041 | -0.114 | 0.026  |

**Table S3.** Estimated demographics in various scenarios based on a 3-year reproductive cycle.

| 3-year reproductive cycle                                 |          |                                 |          |          |                           |          |          |
|-----------------------------------------------------------|----------|---------------------------------|----------|----------|---------------------------|----------|----------|
| Case                                                      | Sex      | $\lambda$ (year <sup>-1</sup> ) | Lower CL | Upper CL | $r$ (year <sup>-1</sup> ) | Lower CL | Upper CL |
| Scenario A<br>(F = 0)                                     | Combined | 1.063                           | 1.008    | 1.119    | 0.061                     | 0.008    | 0.113    |
|                                                           | Male     | 1.097                           | 1.015    | 1.183    | 0.092                     | 0.015    | 0.168    |
|                                                           | Female   | 1.026                           | 0.962    | 1.080    | 0.025                     | -0.039   | 0.077    |
| Scenario B<br>(F = 0.8)                                   | Combined | 0.925                           | 0.860    | 0.993    | -0.079                    | -0.151   | -0.008   |
|                                                           | Male     | 0.942                           | 0.833    | 1.045    | -0.062                    | -0.183   | 0.044    |
|                                                           | Female   | 0.900                           | 0.818    | 0.973    | -0.106                    | -0.201   | -0.028   |
| Scenario C<br>(F = 0.6)                                   | Combined | 0.957                           | 0.892    | 1.021    | -0.045                    | -0.114   | 0.021    |
|                                                           | Male     | 0.979                           | 0.875    | 1.075    | -0.023                    | -0.134   | 0.073    |
|                                                           | Female   | 0.929                           | 0.849    | 0.998    | -0.075                    | -0.164   | -0.002   |
| Scenario D<br>(F = 0.4)                                   | Combined | 0.991                           | 0.929    | 1.054    | -0.010                    | -0.074   | 0.052    |
|                                                           | Male     | 1.017                           | 0.923    | 1.112    | 0.016                     | -0.081   | 0.106    |
|                                                           | Female   | 0.959                           | 0.882    | 1.025    | -0.042                    | -0.125   | 0.024    |
| Scenario E<br>(F = 0.2)                                   | Combined | 1.025                           | 0.968    | 1.084    | 0.024                     | -0.032   | 0.081    |
|                                                           | Male     | 1.055                           | 0.966    | 1.144    | 0.053                     | -0.034   | 0.135    |
|                                                           | Female   | 0.991                           | 0.923    | 1.050    | -0.009                    | -0.080   | 0.049    |
| Scenario P1<br>(F <sub>immature</sub> = 0)                | Combined | 1.017                           | 0.961    | 1.076    | 0.017                     | -0.040   | 0.074    |
|                                                           | Male     | 1.045                           | 0.959    | 1.136    | 0.043                     | -0.042   | 0.128    |
|                                                           | Female   | 0.987                           | 0.919    | 1.046    | -0.013                    | -0.085   | 0.045    |
| Scenario P2<br>(F <sub>mature</sub> = 0)                  | Combined | 0.975                           | 0.919    | 1.036    | -0.026                    | -0.084   | 0.036    |
|                                                           | Male     | 0.998                           | 0.903    | 1.091    | -0.003                    | -0.102   | 0.087    |
|                                                           | Female   | 0.947                           | 0.882    | 1.008    | -0.055                    | -0.126   | 0.008    |
| Scenario P3<br>(F <sub>immature male</sub> = 0)           | Combined | 0.990                           | 0.921    | 1.058    | -0.011                    | -0.082   | 0.056    |
|                                                           | Male     | 1.045                           | 0.956    | 1.134    | 0.044                     | -0.045   | 0.126    |
|                                                           | Female   | 0.904                           | 0.821    | 0.980    | -0.102                    | -0.197   | -0.020   |
| Scenario P4<br>Case 20 (F <sub>mature male</sub> = 0)     | Combined | 0.962                           | 0.898    | 1.031    | -0.040                    | -0.107   | 0.030    |
|                                                           | Male     | 0.998                           | 0.907    | 1.093    | -0.003                    | -0.098   | 0.089    |
|                                                           | Female   | 0.899                           | 0.816    | 0.971    | -0.107                    | -0.023   | -0.029   |
| Scenario P5<br>Case 21 (F <sub>immature female</sub> = 0) | Combined | 0.973                           | 0.916    | 1.026    | -0.027                    | -0.088   | 0.026    |
|                                                           | Male     | 0.942                           | 0.833    | 1.040    | -0.062                    | -0.183   | 0.040    |
|                                                           | Female   | 0.982                           | 0.913    | 1.039    | -0.019                    | -0.091   | 0.039    |
